# Supplementary material
Source: publisher figshare collection journal article supplement (https://acs.figshare.com/ndownloader/files/13996559)
Supplement: Supplementary file 1 [file 13996559]

## Supporting Information

### Efficacious Electrochemical Oxygen Evolution from Novel Co (II)

### Porphyrin-Pyrene based Conjugated Microporous Polymer

*Subhajit Bhunia,<sup>†</sup> Kousik Bhunia,<sup>‡</sup> Bidhan Chandra Patra,<sup>†</sup> Sabuj Kanti Das,<sup>§</sup> Debabrata Pradhan,<sup>‡</sup> Asim Bhaumik,<sup>\*§</sup> Anirban Pradhan,<sup>\*†</sup> Santanu Bhattacharya.<sup>\*†</sup>*

<sup>†</sup>School of Applied and Interdisciplinary Sciences, Indian Association for the Cultivation of Science, Jadavpur, Kolkata - 700032, India. E-mail id.- sb23in@yahoo.com (Prof. S. Bhattacharya), E-mail id.-msap5@iacs.res.in (Dr. A. Pradhan),

<sup>§</sup> School of Materials Sciences, Indian Association for the Cultivation of Science, Jadavpur, Kolkata- 700032, India. E-mail id.- msab@iacs.res.in (Prof. A. Bhaumik)

<sup>‡</sup>Materials Science Centre, Indian Institute of Technology (IIT) Kharagpur-721302, India.

|                                   |                                                                                                                                                                     |                |
|-----------------------------------|---------------------------------------------------------------------------------------------------------------------------------------------------------------------|----------------|
| <b>Section S1 &amp; Figure S1</b> | <i>Synthetic Procedures of building blocks and <math>^1\text{H}</math> NMR</i>                                                                                      | Page S-3-S-6   |
| <b>Figure S2</b>                  | <i>Absence of C-Br bond in Co-MPPy-1 and the C-Br bond in Por-Br (monomer)</i>                                                                                      | Page S-7       |
| <b>Figure S3</b>                  | <i>XPS analysis of Co-MPPy-1 (blue solid line) and Por-Br monomer (red solid line) for Co 2p (left) and N 1s (right)</i>                                            | Page S-8       |
| <b>Figure S4</b>                  | <i>Thermogravimetric (TGA) analysis spectrum of Co-MPPy-1.</i>                                                                                                      | Page S- 9      |
| <b>Figure S5</b>                  | <i>a) Solid state UV-vis spectra of Co-MPPy-1 electrocatalyst (green solid line) and the UV-vis spectra of Por-Br monomer (pink solid line) in chloroform..</i>     | Page S-10      |
| <b>Figure S6</b>                  | <i>CV in different scan rate in 1mM solution of potassium ferricyanide <math>\text{K}_3[\text{Fe}(\text{CN})_6]</math> in 0.1 M pH 7 phosphate buffer solution.</i> | Page S-11      |
| <b>Section S2 &amp; FigureS7</b>  | <i>Areal loading of Co-MPPy-1 electrocatalyst &amp; turn over frequency (TOF) calculation for Co-MPPy-1 electrocatalyst.</i>                                        | Page S-12,S-13 |
| <b>Figure S8</b>                  | <i>Initial LSV study (black solid line) and final LSV study after 1000 cycle (red solid line) of meso-Tetraphenylporphyrin cobalt(II) complex (Por-Br)</i>          | Page S-14      |
| <b>Table S1</b>                   | <i>Benchmarking of cobalt based OEC with Co-MPPy-1.</i>                                                                                                             | Page S-15      |
| <b>Reference</b>                  | -                                                                                                                                                                   | Page S-16      |

## Section S1

### 1.Synthesis

#### 1.1. Synthesis of 1,3,6,8-tetrakis(4,4,5,5-tetramethyl-1,3,2-dioxaborolan-2-yl)pyrene

1,3,6,8-tetrabromopyrene (1.0 g, 1.9 mmol) and bis(pinacolato)diboron (2.9 g, 11.4 mmol) and potassium acetate (1.2 g, 11.9 mmol) was taken in a predried scelnk flask. Pd(dppf)Cl<sub>2</sub> (0.12 g, 0.16 mmol) was added in anhydrous DMSO (20 mL) and transfer this slurry to the scelnk flask via cannula. The mixture was degassed properly via three freeze pump thaw cycles prior to heating. Then the reaction mixture was stirred at 80 °C for 72 h under inert atmosphere. The reaction mixture was allowed to cool down and extracted with dichloromethane. The organic layer was passed through a short column to remove the catalyst and solvent was completely removed by the evaporation to afford the greenish white solid. Then the solid was washed extensively with hot toluene to obtain the product as pale white solid (980 mg, 72%).

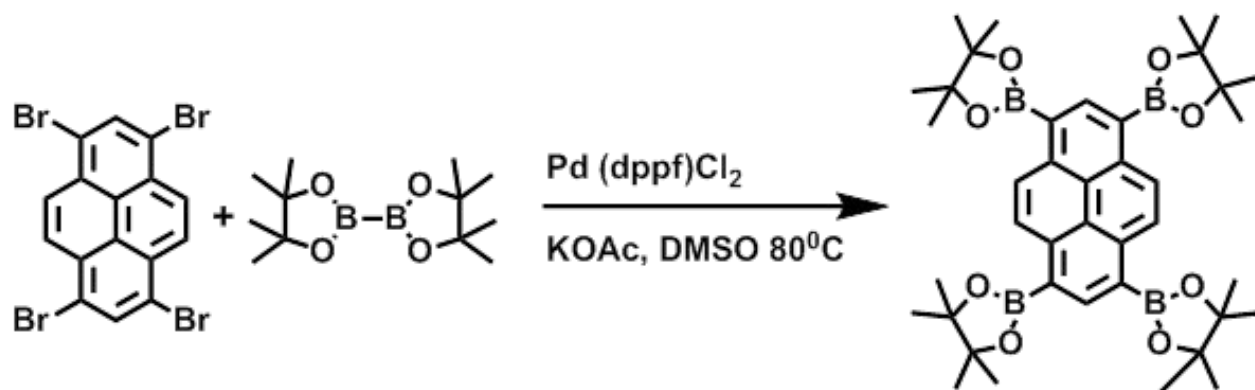

## 1.2. 5,10,15,20-(tetra-4-bromophenyl)porphyrin Cobalt (II)

A mixture of p-bromobenzaldehyde (1.86 g, 10 mmol) in propionic acid (40 mL) was heated up to 120 °C and then freshly distilled pyrrole (0.7 mL, 10 mmol) was added to the mixture. The mixture was stirred at 120 °C for 3h and cooled to room temperature for 3 days. The blackish violet precipitate was collected through filtration and washed with methanol extensively. The crude mixture was recrystallized from chloroform/methanol mixture to get the pure product as an needle like violet crystal (540 mg, 23%). The metalation step had been done by the mixing of methanolic solution (20 ml) of 5,10,15,20-(tetra-4-bromophenyl)porphyrin (0.54 g, 0.575 mmol) with  $\text{Co}(\text{OAc})_2 \cdot 4\text{H}_2\text{O}$  (143.21 mg, 0.575 mmol) and reflux for 4 h. purple solid was obtained through filtration (453 mg, 81%).

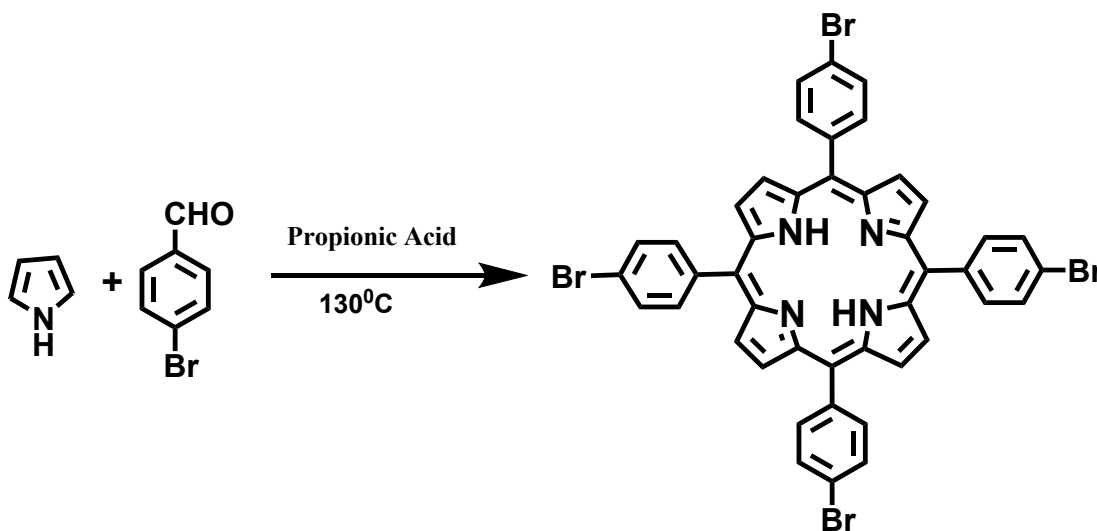

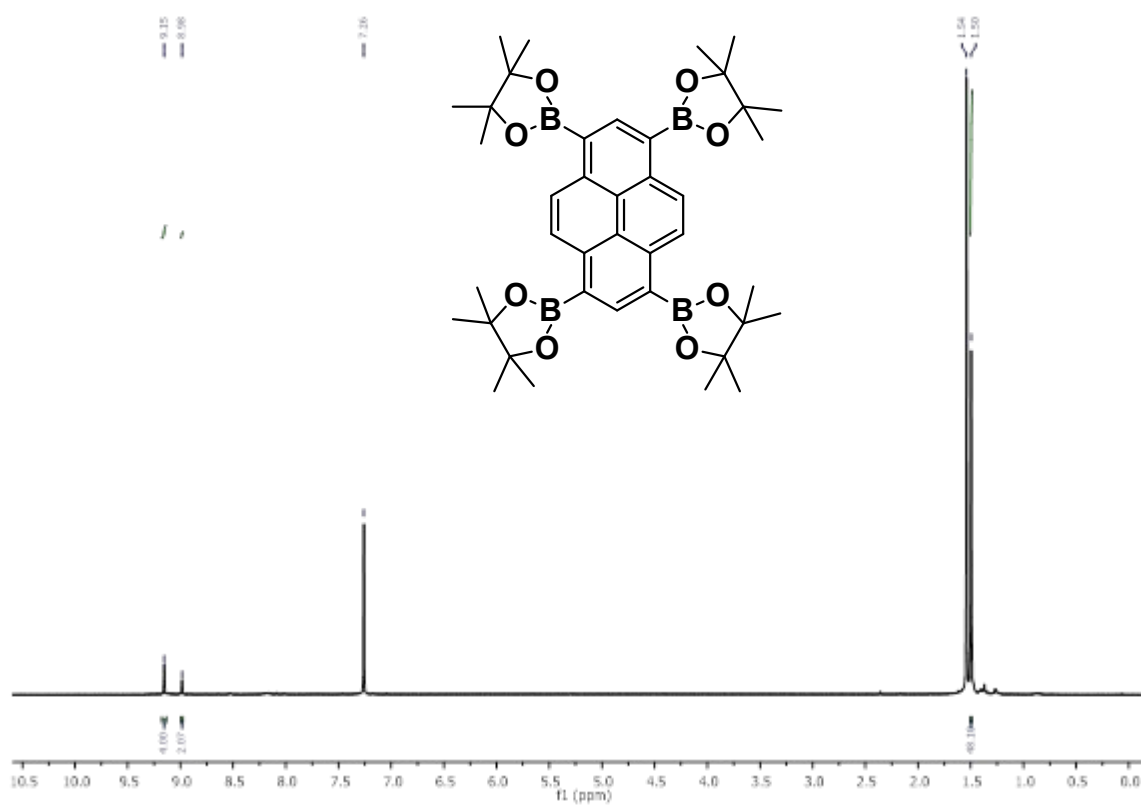

**Figure S1a.**  $^1\text{H}$  NMR of 1,3,6,8-tetrakis(4,4,5,5-tetramethyl-1,3,2-dioxaborolan-2-yl)pyrene

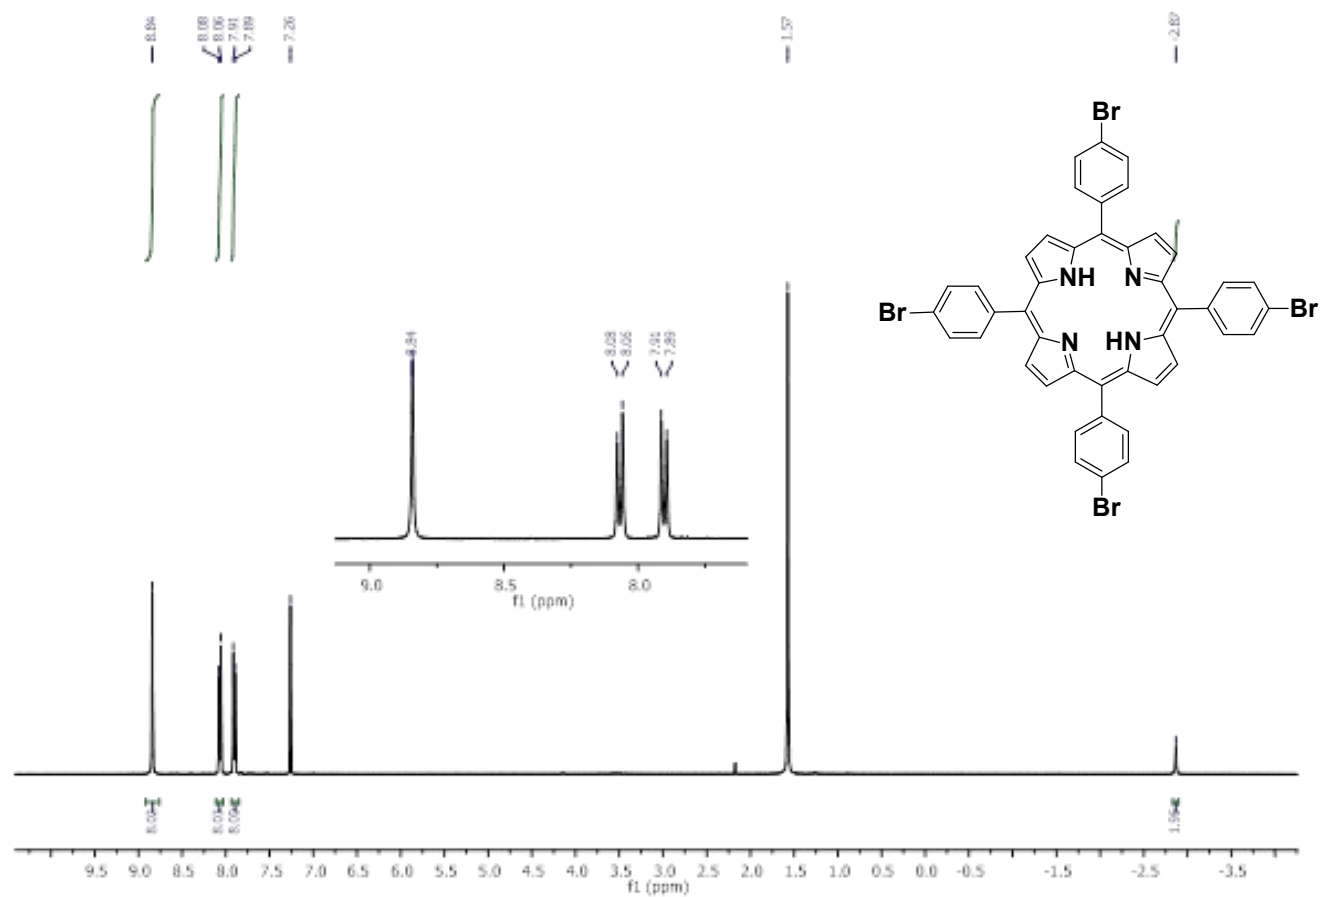

**Figure S1b.**  $^1\text{H}$  NMR of 5,10,15,20-(tetra-4-bromophenyl)porphyrin

**Figure S2**

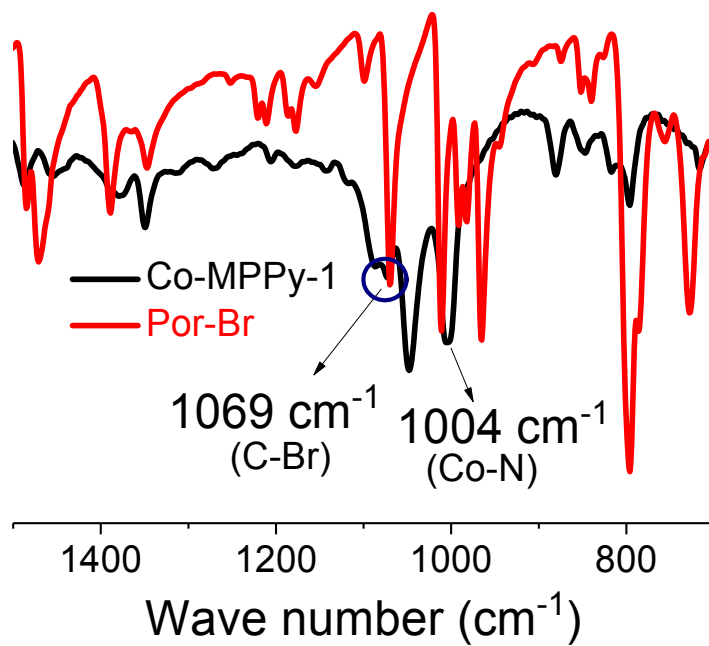

**Figure S2.** Absence of C-Br bond in Co-MPPy-1 (blue encircled) and the C-Br bond in Por-Br (monomer)

**Figure S3**

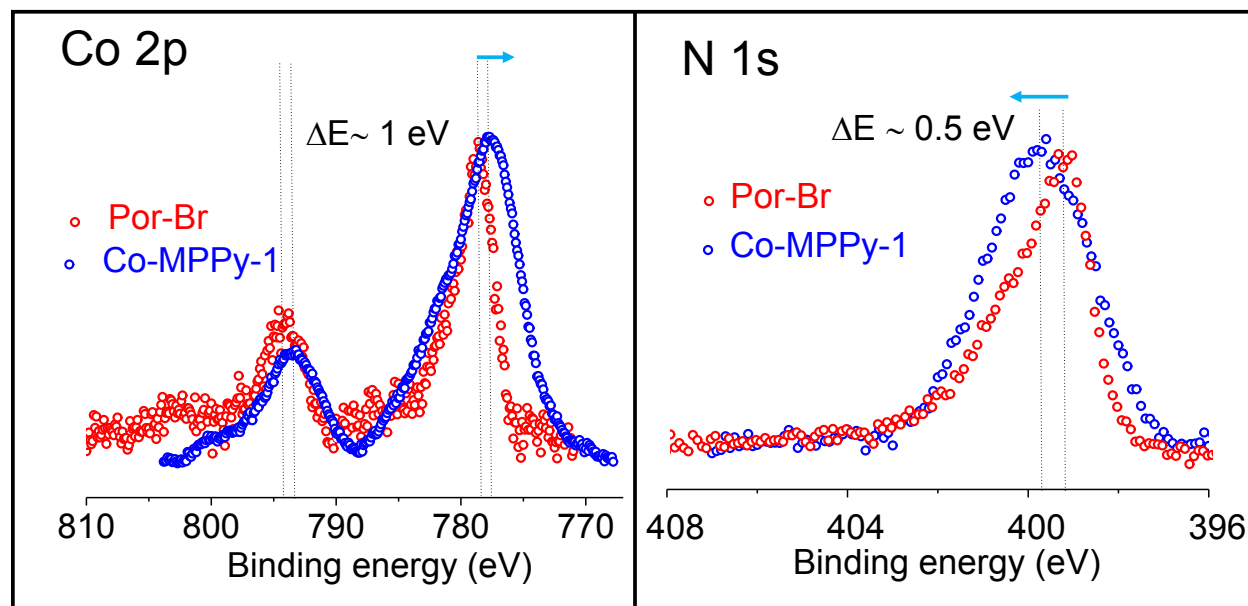

**Figure S3.** XPS analysis of Co-MPPy-1 (blue solid line) and Por-Br monomer (red solid line) for Co 2p (left) and N 1s (right)



**Figure S4**

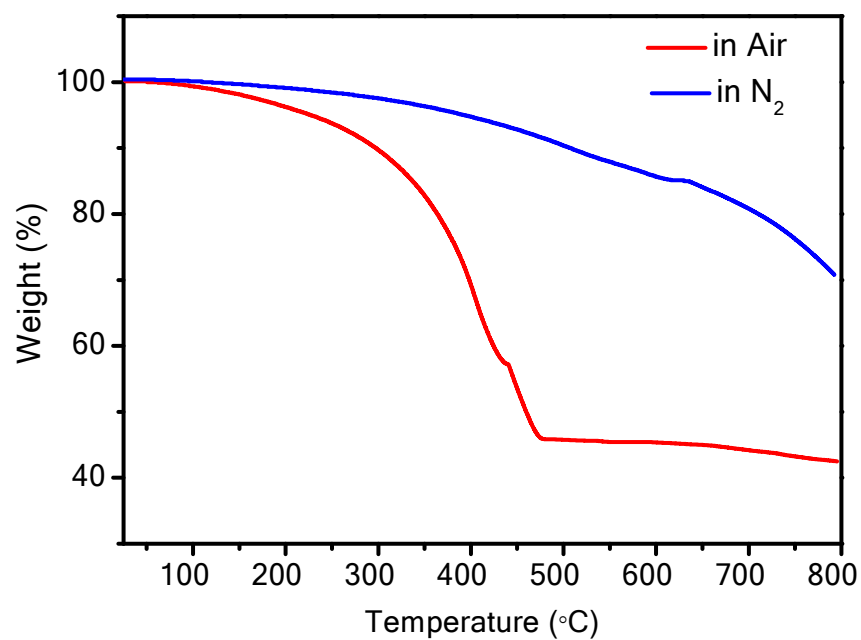

**Figure S4.** Thermo-gravimetric analysis (TGA) of Co-MPPy-1 in presence of air (red solid line) and N<sub>2</sub> (blue solid line)

**Figure S5**

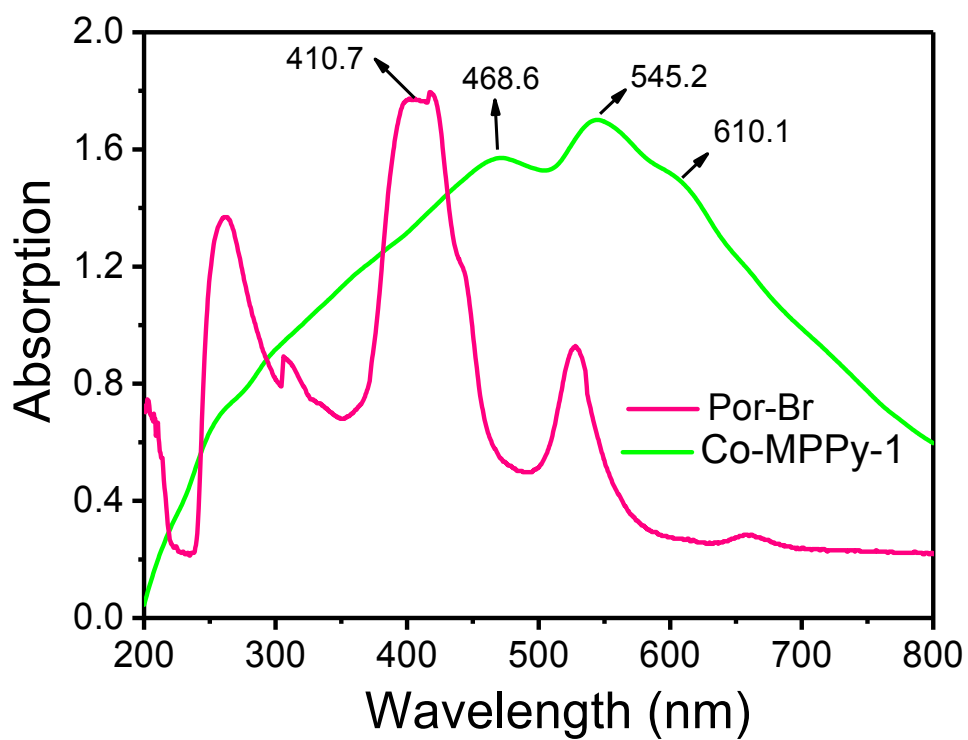

**Figure S5.** a) Solid state UV-vis spectra of Co-MPPy-1 electrocatalyst (green solid line) and the UV-vis spectra of Por-Br monomer (pink solid line) in  $\text{CHCl}_3$ .

**Figure S6**

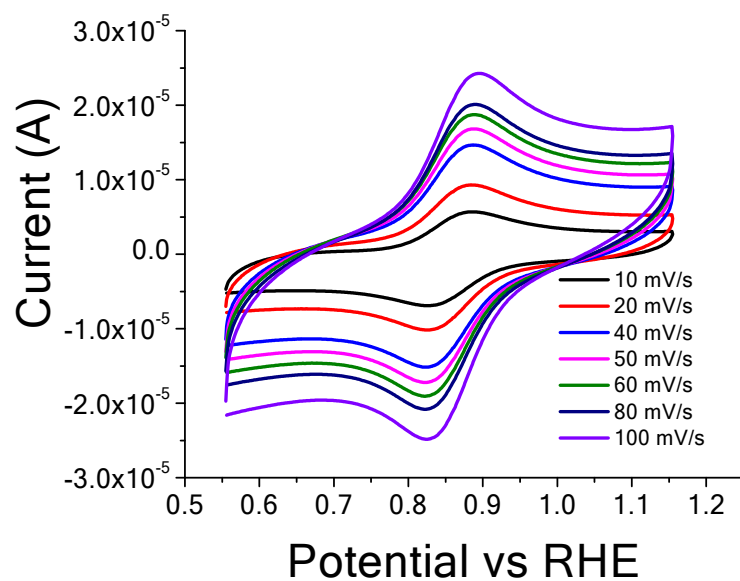

**Figure S6.** CV in different scan rate in 1mM solution of potassium ferricyanide  $\text{K}_3[\text{Fe}(\text{CN})_6]$  in 0.1 M pH 7 phosphate buffer solution.

## Section S2

### a) Areal catalyst loading on rotating disc electrode (RDE)

| Area loading of Co-MPPy-1<br>(mg/cm <sup>2</sup> ) | Area loading of Co<br>(mg/cm <sup>2</sup> ) | Area loading of Co<br>(mM/cm <sup>2</sup> ) |
|----------------------------------------------------|---------------------------------------------|---------------------------------------------|
| 0.571                                              | $2.8 \times 10^{-2}$                        | $4.7 \times 10^{-4}$                        |

### b) Calculation of Surface Coverage ( $\tau_0$ ) and number of active cobalt mol/m<sup>2</sup> in Co-MPPy-1

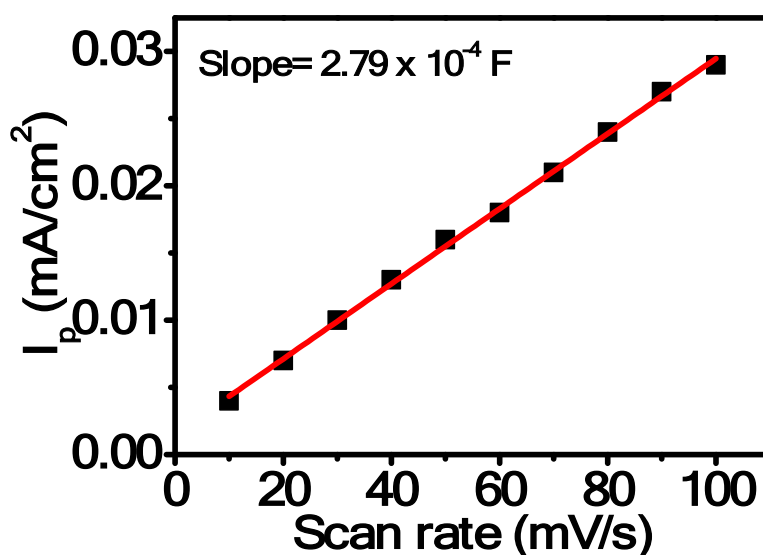

Figure S7. Linear fit of the plot of  $i_p$  vs scan rate.

CV of Co-MPPy-1 coated GC electrode had been taken at different scan rate to determine the active Co atom (mol/cm<sup>2</sup>) at the surface. The surface coverage of active cobalt atom was determined by the slope of anodic current corresponding to Co<sup>2+</sup>/Co<sup>3+</sup> redox system vs scan rate (mV/s) using the following equation.

$$\text{Slope} = n^2 F^2 A \tau_0 / 4RT$$

n = number of electrons involved; F = Faraday Constant in C/mol; A = geometrical surface area of the electrode (0.07 cm<sup>2</sup>);  $\tau_0$  = surface coverage, R = gas constant; T = temperature (K).

The surface coverage of the cobalt atom was  $4.23 \times 10^{-9}$  mol/ cm<sup>2</sup>.

**Turn over frequency calculation (TOF)**

$$TOF = \frac{(J \times A)}{(4 \times F \times m)} = 0.43/ \text{ sec.}$$

J= Current density (A/cm<sup>2</sup>) at overpotential 420 mV.

A= Geometrical surface area of the RDE.

F= 96500 C/mol.

m= moles of the active cobalt atom present on electrode.

**Figure S8**

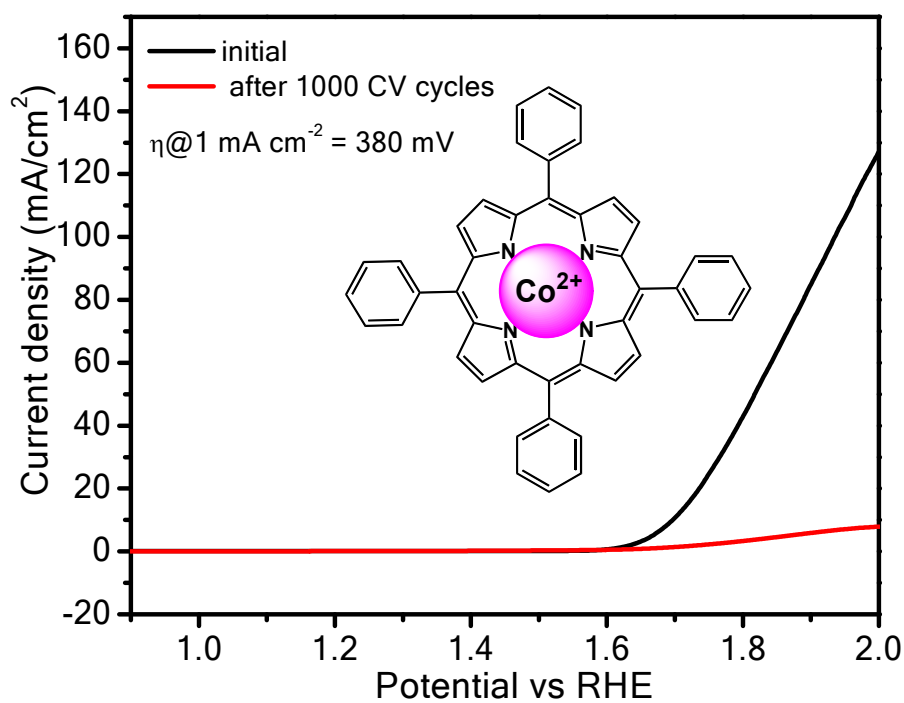

**Figure S8.** Initial LSV study (black solid line) and final LSV study after 1000 cycle (red solid line) of *meso*-Tetraphenylporphyrin cobalt(II) complex (Por-Br)

Table S1

**Benchmarking of cobalt based OEC with Co-MPPy-1**

| Electrocatalyst                                      | Overpotential ( $\eta$ )                                           | references         |
|------------------------------------------------------|--------------------------------------------------------------------|--------------------|
| Co <sub>3</sub> O <sub>4</sub> /mMWCNT               | 510 mV@10 mA/cm <sup>2</sup>                                       | 2                  |
| Co <sub>3</sub> O <sub>4</sub> /graphene<br>(CG-CoO) | 430 mV@10 mA/cm <sup>2</sup>                                       | 3                  |
| Co-TpBpy<br>(COF material)                           | 400 mV@1 mA/cm <sup>2</sup>                                        | 4                  |
| (CoP)n-MWCNTs<br>(carbon nanotube)                   | 300 mV@1 mA/cm <sup>2</sup>                                        | 5                  |
| FeTPyP-Co<br>(Bimetallic MOF)                        | 430 mV@1 mA/cm <sup>2</sup>                                        | 6                  |
| Co-Fe Prussian<br>Blue<br>(Co-ordination<br>polymer) | 400 mV@ 1 mA/cm <sup>2</sup>                                       | 7                  |
| Co-N-doped carbon                                    | 371 mV@10 mA/cm <sup>2</sup>                                       | 8                  |
| <b>Co-MPPy-1</b>                                     | <b>340 mV@1 mA/cm<sup>2</sup><br/>420 mV@ 10 mA/cm<sup>2</sup></b> | <b>-This work-</b> |

## References

1. Han, A.; Jia, H.; Ma, H.; Ye, S.; Wu, H. ; Lei, H.; Han, Y.; Cao, R. ; Du, P. *Phys. Chem. Chem. Phys.* **2014**, *16*, 11224-11232 .
2. Lu, X.; Zhao, C. *J. Mater. Chem. A* **2013**, *1*, 12053–12059.
3. Mao, S.; Wen, Z.; Huang, T.; Hou Y.; J. Chen, *Energy Environ. Sci.* **2014**, *7*, 609-616.
4. Aiyappa, H. B.; Thote, J.; Shinde, D. B.; Banerjee, R.; Kurungot, S. *Chem. Mater.* **2016**, *28*, 4375–4379.
5. Jia, H.; Sun, Z.; Jiang, D.; Du, P. *Chem. Mater.* **2015**, *27*, 4586–4593.
6. Wurster, B.; Grumelli, D.; Hötger, D.; Gutzler, R.; Kern, K. *J. Am. Chem. Soc.* **2016**, *138*, 3623–3626.
7. Pintado, S.; Goberna-Ferrón, S.; Escudero-Adán, E. C.; Galán-Mascarós, J. R. *J. Am. Chem. Soc.* **2013**, *135*, 13270–13273.
8. Su, Y.; Zhu, Y.; Jiang, H.; Shen, J.; Yang, X.; Zou, W.; Chen, J., Li, C. *Nanoscale* **2014**, *6*, 15080-15089.
